# Supplementary material for: Analysis of Metabolite Distribution in Rat Liver of High-Fat Model by Mass Spectrometry Imaging
Source: MDPI journal article supplement (doi:10.3390/metabo13030411), 2023-03-10
Supplement: s1 [file s1]

# Analysis of Metabolite Distribution in Rat Liver of High-Fat Model by Mass Spectrometry Imaging

Hongmei Mao<sup>1</sup>, Wenjun Wang<sup>2</sup>, Xuesong Xiang<sup>1</sup>, Yan Li<sup>1</sup>, Jinpeng Zhao<sup>1</sup>, Yin Huang<sup>3</sup>, Shuangshuang Di<sup>4,5</sup>, Qin Zhuo<sup>1\*</sup> and Honggang Nie<sup>4,5\*</sup>

<sup>1</sup> Key Laboratory of Trace Element Nutrition of National Health Commission, National Institute for Nutrition and Health, Chinese Center for Diseases Control and Prevention, Beijing 100050, China

<sup>2</sup> Beijing Junfeix Technology Co., Ltd, Beijing 100081, China

<sup>3</sup> Suzhou PANOMIX Biomedical Technology Co., Ltd, Suzhou 215125, China

<sup>4</sup> Analytical Instrumentation Center, Peking University, Beijing 100871, China

<sup>5</sup> Beijing National Laboratory for Molecular Sciences, College of Chemistry and Molecular Engineering, Peking University, Beijing 100871, China

\* Correspondence: zhuoqin@ninh.chinacdc.cn (Q.Z.); hgnie@pku.edu.cn (H.N.)

## Supplementary Materials:

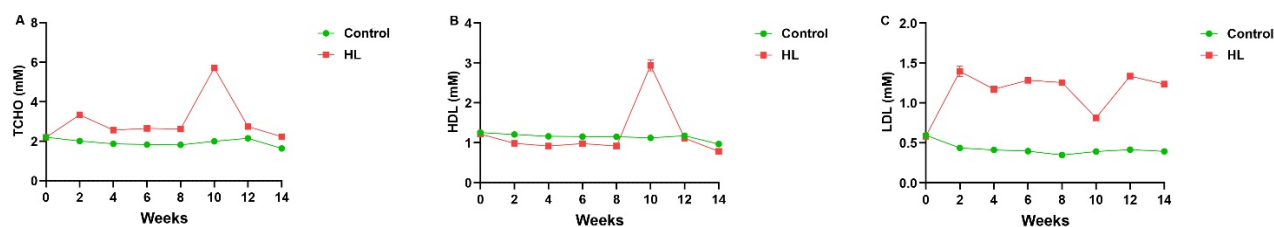

Figure S1: TCHO, HDL and LDL content in rat serum. Green lines and columns are present Control, red lines and columns are present HL.

Table S1 16 identified metabolites in the Venn diagram (Figure 7A)

Table S1-1

| No. | MS number | m/z      | Identification      | Adduct               | Formula     | Exact_mass | Hmdb/lipidmaps |
|-----|-----------|----------|---------------------|----------------------|-------------|------------|----------------|
| C01 | MSI03462  | 785.5567 | PA(20:3-OH/i-21:0)  | [M+H] <sup>+</sup>   | C44H81O9P   | 762.5774   | HMDB0268345    |
| C02 | MSI02408  | 785.4830 | PA(20:4-OH/22:6)    | [M+H] <sup>+</sup>   | C43H70O11   | 784.4679   | HMDB0266196    |
| C03 | MSI04736  | 785.5004 | PG(20:5-OH/i-16:0)  | [M+H] <sup>+</sup>   | C42H73O11P  | 784.4891   | HMDB0271531    |
| C04 | MSI00846  | 785.4549 | PG(22:6-2OH/i-13:0) | [M+H] <sup>+</sup>   | C41H69O12P  | 784.4526   | HMDB0271238    |
| C05 | MSI00714  | 785.5701 | PG(O-18:0/20:4)     | [M+H] <sup>+</sup>   | C44H81O9P   | 784.5618   | LMGP04020071   |
| C06 | MSI01398  | 785.4075 | PGP(18:3-OH/i-12:0) | [M+H] <sup>+</sup>   | C36H66O14P2 | 784.3928   | HMDB0274876    |
| C07 | MSI03632  | 867.4358 | PGP(PGJ2/i-15:0)    | [M+H] <sup>+</sup>   | C41H72O15P2 | 866.4346   | HMDB0275130    |
| C08 | MSI01257  | 785.5775 | SM(d18:0/18:1-2OH)  | [M+Na] <sup>+</sup>  | C41H83N2O8P | 762.5887   | HMDB0290479    |
| C09 | MSI03021  | 768.6707 | TG(14:0/14:0/16:0)  | [M+NH4] <sup>+</sup> | C47H90O6    | 750.6737   | HMDB0042063    |
| C10 | MSI04969  | 803.2670 | not identified      |                      |             |            |                |
| C11 | MSI00950  | 549.4876 | not identified      |                      |             |            |                |
| C12 | MSI02187  | 696.9602 | not identified      |                      |             |            |                |
| C13 | MSI04057  | 659.1703 | not identified      |                      |             |            |                |
| C14 | MSI03088  | 857.0959 | not identified      |                      |             |            |                |
| C15 | MSI00577  | 898.7447 | not identified      |                      |             |            |                |
| C16 | MSI04181  | 665.0880 | not identified      |                      |             |            |                |

Table S1-2

| No. | C1-Control_8W vs HL_8W |         |        | C2-Control_14W vs Control_8W |         |        | C3-Control_14W vs HL_14W |         |        | C4-HL_14W vs HL_8W |         |        |
|-----|------------------------|---------|--------|------------------------------|---------|--------|--------------------------|---------|--------|--------------------|---------|--------|
|     | Fold                   | p value | VIP    | Fold                         | p value | VIP    | Fold                     | p value | VIP    | Fold               | p value | VIP    |
| C01 | 0.5265                 | 0.0000  | 1.4227 | 1.0175                       | 0.0153  | 0.7678 | 0.9117                   | 0.0000  | 1.0722 | 1.7620             | 0.0000  | 1.2787 |
| C02 | 0.5355                 | 0.0000  | 1.4139 | 1.0933                       | 0.0000  | 1.1046 | 0.9866                   | 0.0069  | 0.7498 | 2.0142             | 0.0000  | 1.2844 |
| C03 | 0.5355                 | 0.0000  | 1.4139 | 1.0933                       | 0.0000  | 1.1046 | 0.9866                   | 0.0069  | 0.7498 | 2.0142             | 0.0000  | 1.2844 |
| C04 | 0.3389                 | 0.0000  | 1.4111 | 1.0405                       | 0.0986  | 0.5526 | 1.0433                   | 0.0007  | 0.8795 | 3.2032             | 0.0000  | 1.2822 |
| C05 | 0.5621                 | 0.0000  | 1.4215 | 1.0171                       | 0.0214  | 0.7354 | 0.9140                   | 0.0000  | 1.0699 | 1.6537             | 0.0000  | 1.2769 |
| C06 | 0.3322                 | 0.0000  | 1.4144 | 1.0365                       | 0.0818  | 0.5790 | 1.0380                   | 0.0011  | 0.8581 | 3.2390             | 0.0000  | 1.2823 |
| C07 | 1.7009                 | 0.0000  | 1.3769 | 1.6633                       | 0.0000  | 0.5037 | 0.6539                   | 0.0000  | 0.5273 | 0.6395             | 0.0000  | 1.1877 |
| C08 | 0.5623                 | 0.0000  | 1.4215 | 1.0169                       | 0.0220  | 0.7328 | 0.9144                   | 0.0000  | 1.0695 | 1.6535             | 0.0000  | 1.2769 |
| C09 | 0.5589                 | 0.0000  | 1.3832 | 1.0722                       | 0.0010  | 0.9598 | 0.8398                   | 0.0129  | 0.7037 | 1.6113             | 0.0001  | 1.0486 |
| C10 | 0.5583                 | 0.0000  | 1.2497 | 1.0522                       | 0.0184  | 0.7503 | 0.8917                   | 0.0007  | 0.8779 | 1.6804             | 0.0001  | 1.0723 |
| C11 | 0.5993                 | 0.0000  | 1.2978 | 1.1395                       | 0.0014  | 0.9390 | 0.9653                   | 0.0001  | 0.9720 | 1.8353             | 0.0000  | 1.2457 |
| C12 | 0.4208                 | 0.0001  | 1.1778 | 0.8958                       | 0.0004  | 1.0062 | 1.0866                   | 0.0086  | 0.7345 | 2.3130             | 0.0001  | 1.0438 |
| C13 | 0.6823                 | 0.0009  | 1.0664 | 1.1653                       | 0.0005  | 0.9951 | 0.9523                   | 0.0013  | 0.8471 | 1.6266             | 0.0000  | 1.1079 |
| C14 | 0.2627                 | 0.0000  | 1.3010 | 1.8486                       | 0.0000  | 0.9828 | 0.9241                   | 0.0329  | 0.7861 | 6.5020             | 0.0000  | 1.2672 |
| C15 | 0.6508                 | 0.0000  | 1.4177 | 0.9996                       | 0.8894  | 0.8071 | 0.3854                   | 0.0000  | 0.9866 | 0.5920             | 0.0000  | 1.2656 |
| C16 | 0.4033                 | 0.0000  | 1.3874 | 0.9741                       | 0.0605  | 1.1502 | 0.6966                   | 0.0000  | 0.9367 | 1.6823             | 0.0002  | 1.0323 |
